# Supplementary material
Source: MDPI journal article supplement (https://www.mdpi.com/2073-4395/12/10/2566)
Supplement: s1 [file s1]

## Supplementary Materials

**Table S1.** Cycle threshold (C<sub>T</sub>) values determined by RT-qPCR and 16S-rDNA plasmid copy number of '*Candidatus Liberibacter asiaticus*' in leaves of negative controls.

| Plasmid Copy Number                                                                               | Log plasmid Copy Number | Cycle Threshold (C <sub>T</sub> Values) <sup>a</sup> | SD <sup>b</sup> |
|---------------------------------------------------------------------------------------------------|-------------------------|------------------------------------------------------|-----------------|
| 3.00x10 <sup>9</sup>                                                                              | 9.48                    | 8.98                                                 | 0.25            |
| 3.00x10 <sup>8</sup>                                                                              | 8.48                    | 8.06                                                 | 0.41            |
| 3.00x10 <sup>7</sup>                                                                              | 7.48                    | 11.50                                                | 0.24            |
| 3.00x10 <sup>6</sup>                                                                              | 6.48                    | 14.87                                                | 0.13            |
| 3.00x10 <sup>5</sup>                                                                              | 5.48                    | 17.82                                                | 0.27            |
| 3.00x10 <sup>4</sup>                                                                              | 4.48                    | 20.87                                                | 0.20            |
| 3.00x10 <sup>3</sup>                                                                              | 3.48                    | 24.35                                                | 0.48            |
| 3.00x10 <sup>2</sup>                                                                              | 2.48                    | 27.14                                                | 0.19            |
| 3.00x10 <sup>1</sup>                                                                              | 1.48                    | 31.73                                                | 0.75            |
| 3.00                                                                                              | 0.48                    | 34.02                                                | 0.62            |
| 0.30                                                                                              | -0.52                   | 35.53                                                | 0.20            |
| Range of C <sub>T</sub> values for the negative control <sup>c</sup> —from 33.29 to undetermined. |                         |                                                      |                 |

<sup>a</sup> Values are mean of three replicates. <sup>b</sup> Standard deviation. <sup>c</sup> Micrografted plants grown in a greenhouse. A total of 44 DNA extractions and RT-qPCRs from eight different plants are shown.

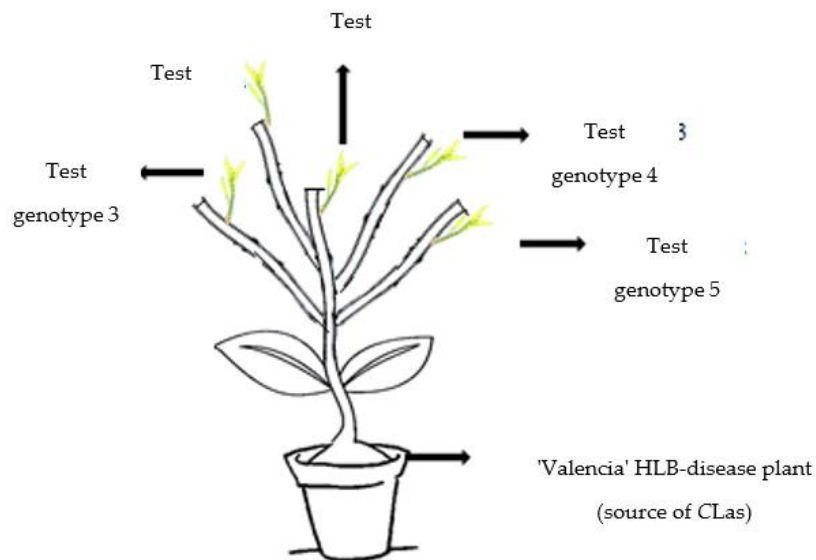

**Figure S1.** Representation of the experiment setup to test the susceptibility of citrandarin hybrids and parents top grafted on sweet orange 'Valencia' plants infected with *Candidatus Liberibacter asiaticus*. The numbers (1, 2, 3, 4, and 5) represent different citrandarin genotypes or parents.

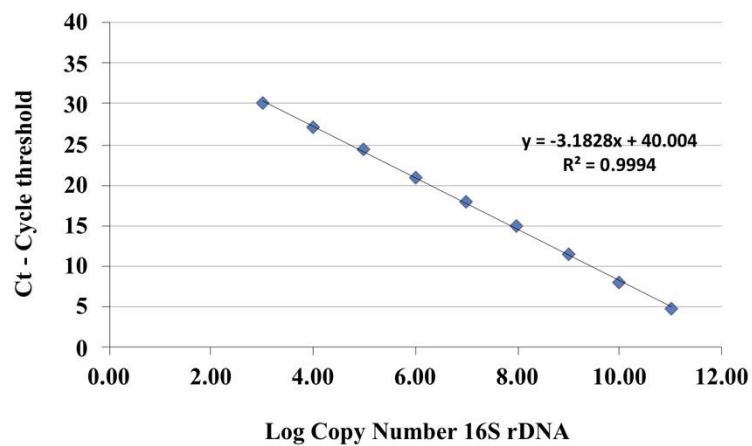

**Figure S2.** Standard curve for estimating bacterial population through 16S rDNA insert of *Candidatus Liberibacter asiaticus* (X-axis).

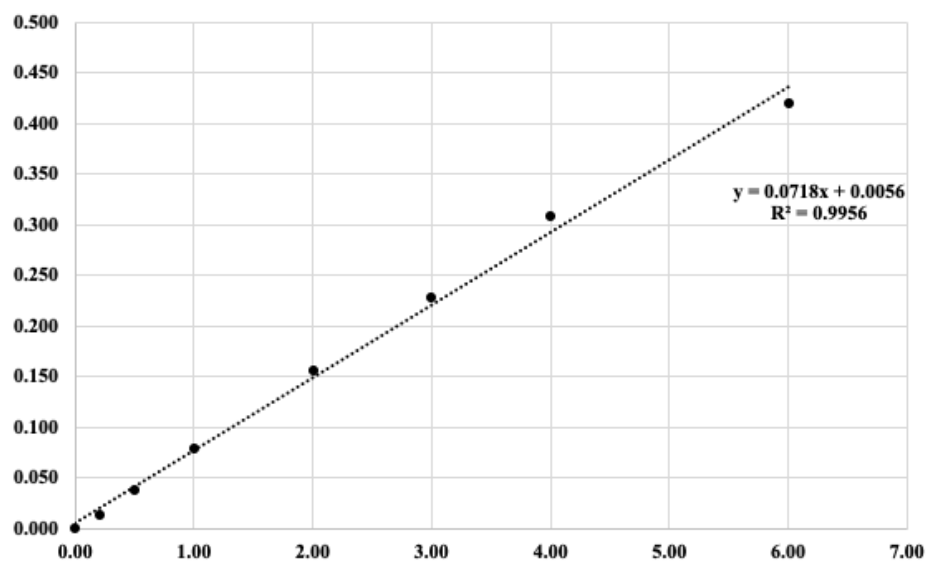

**Figure S3.** Standard curve for the quantification of glucose released by enzymatic degradation of starch.
